# Supplementary material for: Assembly of three-dimensional networks based upon silver–ethynide complexes bearing pyridyl and carboxylate groups
Source: Royal Society of Chemistry journal article supplement (doi:10.1039/c2dt32030d), 2012-12-17
Supplement: c2dt32030d.pdf [file c2dt32030d.pdf]

## Supporting Information

### Assembly of three-dimensional networks based upon silver-ethynide complexes bearing pyridyl and carboxylate groups

Zifei Zhang,<sup>a</sup> Bao Li,<sup>a</sup> Xianggao Meng,<sup>b</sup> Xiangbing Yin,<sup>a</sup> and Tianle Zhang<sup>\*,a</sup>

<sup>a</sup> School of Chemistry and Chemical Engineering, Huazhong University of Science and Technology, Wuhan, Hubei 430074, P. R. China; E-mail: [tlzhang@mail.hust.edu.cn](mailto:tlzhang@mail.hust.edu.cn). Fax: 86-27-87543632

<sup>b</sup> College of Chemistry, Central China Normal University, Wuhan, Hubei 430079, P. R. China

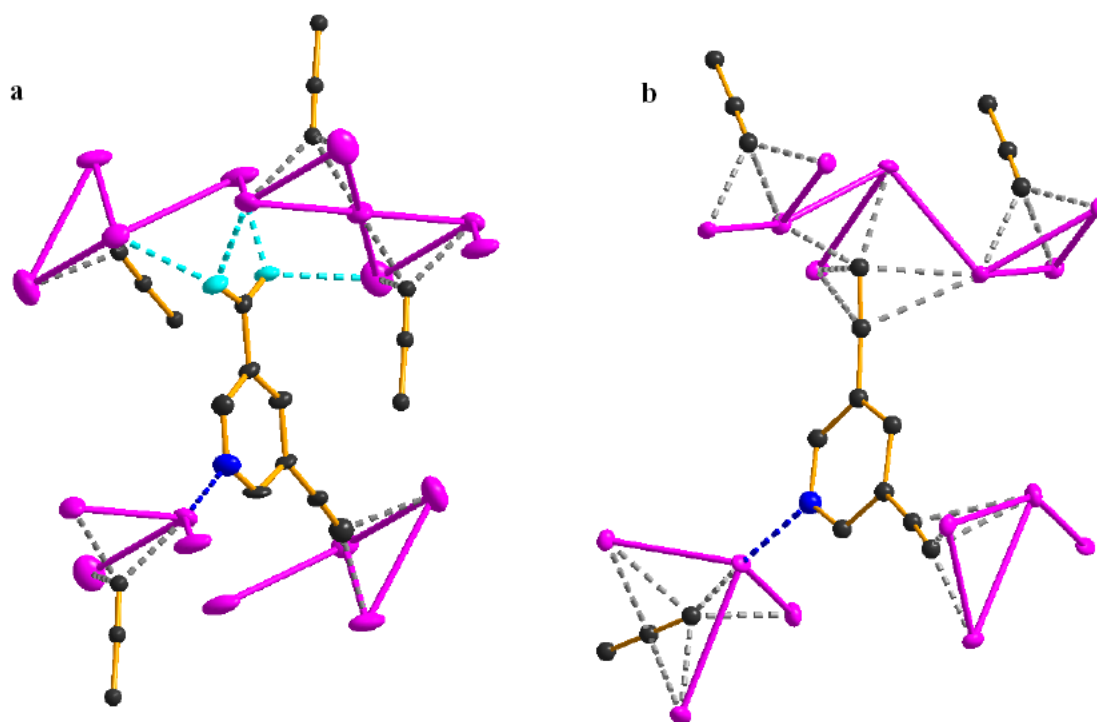

**Figure S1.** Binding modes of L1 (a) and 3,5-diethynylpyridine ligands (b).

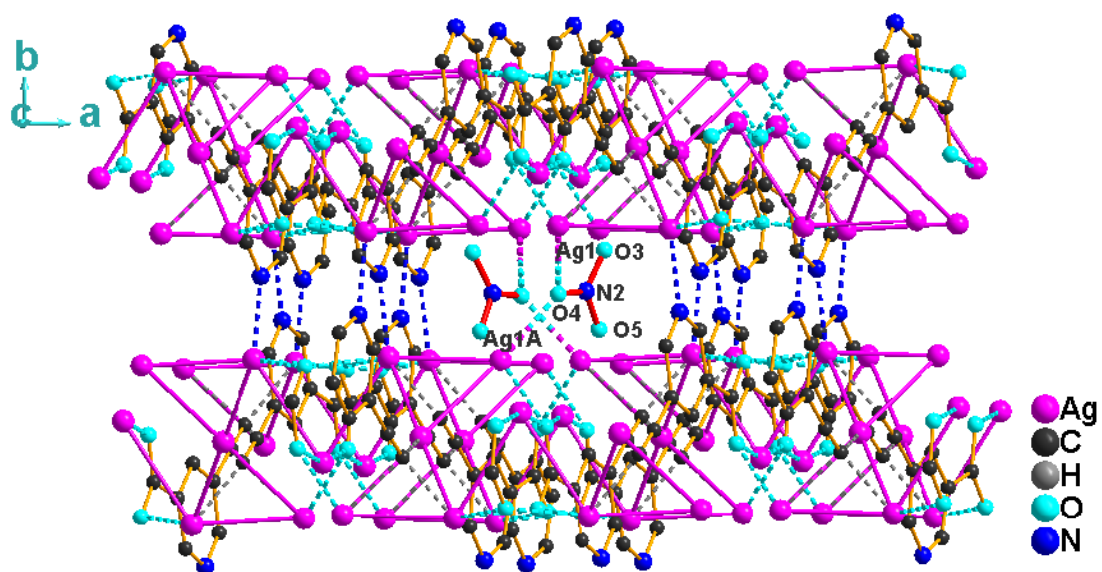

Figure S2. Binding mode of nitrate anions in 1.

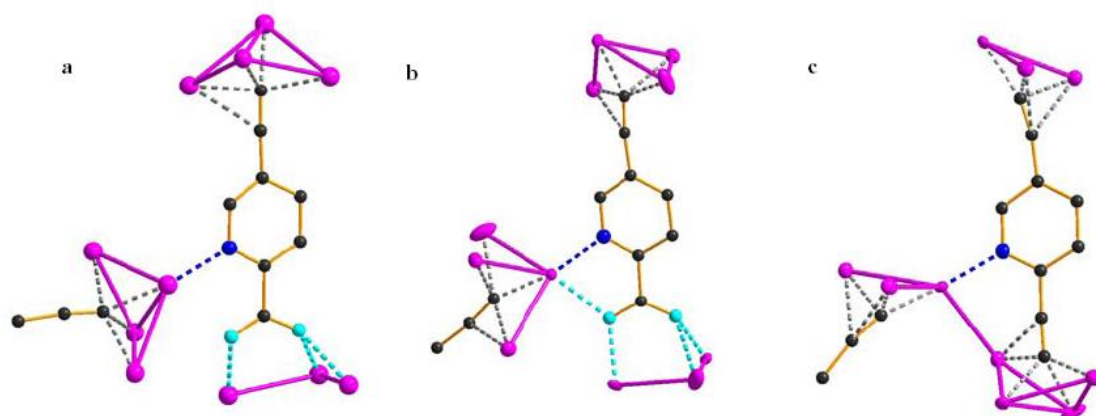

Figure S3. Binding modes of L2 (a, b) and 2,5-pyridyldiethynide ligands (c) in silver-ethynide complexes.

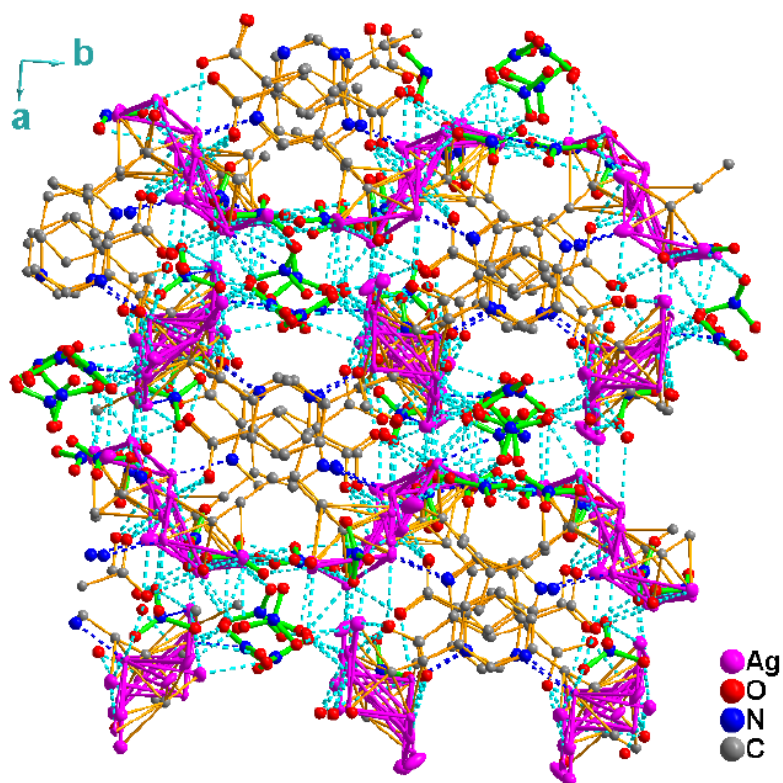

**Figure S4.** Nitrate anions located in the cavities in **2**.

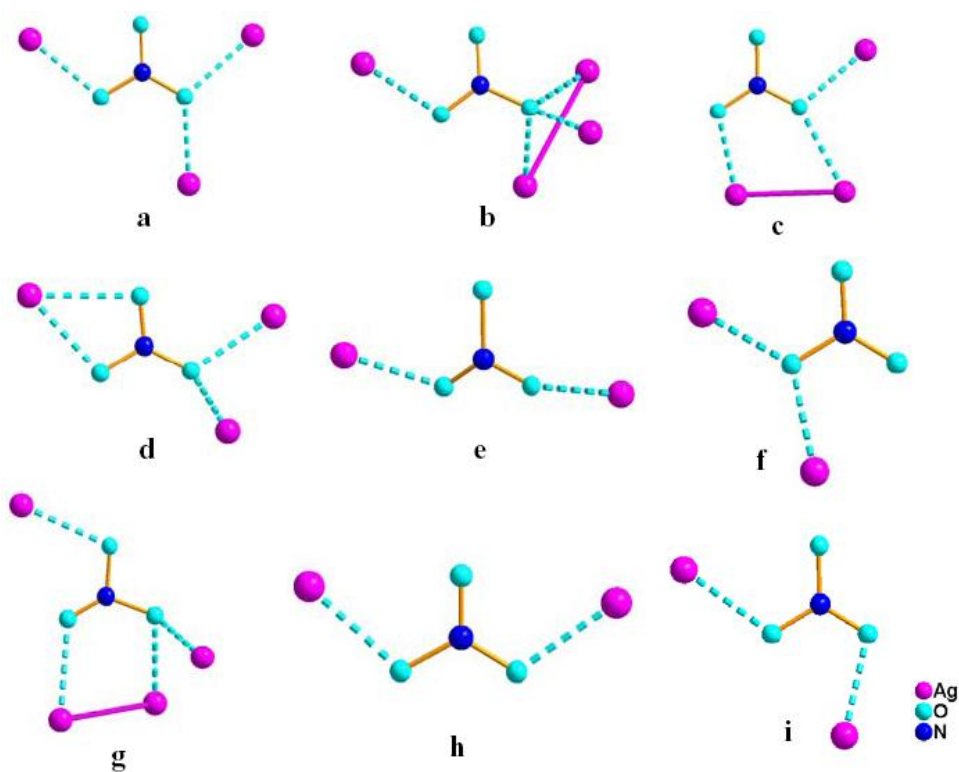

**Figure S5.** Binding modes of nitrate anions in **2**.
